# Supplementary material
Source: publisher figshare collection journal article supplement (https://gsapubs.figshare.com/ndownloader/files/23308865)
Supplement: Supplementary file 1 [file 23308865]

## Sheet: Table S1
Table DR1. HISTORICAL IMAGERY USED FOR DISPLACEMENT ANALYSIS
Image number	Image Date (decimal year)*	Image Date Error (a)†	Total RMS Georeferencing Error (m)§	Source	Source Website
1	1937.5	0.5	5.93349	UC Berkeley Earth Sciences and Map Library	www.lib.berkeley.edu/EART/air-catalog.html
2	1948.5	0.5	1.73152	Historic Aerials	www.historicaerials.com
3	1960.5	0.5	2.31134	Historic Aerials	www.historicaerials.com
4	1968.5	0.5	3.56781	Historic Aerials	www.historicaerials.com
5	1971.5	0.5	2.47825	Historic Aerials	www.historicaerials.com
6	1987.5	0.5	3.03379	Historic Aerials	www.historicaerials.com
7	1993.44	0.25	2.74606	Google Earth	www.google.com/earth
8	1998.5	0.5	2.24374	Historic Aerials	www.historicaerials.com
9	2002.37	0.25	3.7669	Google Earth	www.google.com/earth
10	2003.45	0.25	2.47624	National Agricultural Imagery Program	gdg.sc.egov.usda.gov
11	2004.51	0.25	2.89336	National Agricultural Imagery Program	gdg.sc.egov.usda.gov
12	2005.45	0.25	2.04071	National Agricultural Imagery Program	gdg.sc.egov.usda.gov
13	2006.46	0.25	2.60058	National Agricultural Imagery Program	gdg.sc.egov.usda.gov
14	2009.38	0.25	0.860104	National Agricultural Imagery Program	gdg.sc.egov.usda.gov
15	2010.41	0.25	1.55464	National Agricultural Imagery Program	gdg.sc.egov.usda.gov
16	2011.34	0.25	1.67709	Google Earth	www.google.com/earth
17	2012.38	0.25	0.993469	National Agricultural Imagery Program	gdg.sc.egov.usda.gov
18	2013.42	0.25	1.0953	Google Earth	www.google.com/earth
19	2014.75	0.25	1.33929	National Agricultural Imagery Program	gdg.sc.egov.usda.gov
20	2015.83	0.25	2.14184	Google Earth	www.google.com/earth
21	2016.74	0.25	0	National Agricultural Imagery Program	gdg.sc.egov.usda.gov
22	2017.53	0.0003	1.56	Planet Labs Inc.	www.planet.com
*Year for each image was given, but date was occasionally inferred from a range of listed acquisition dates or inferred from seasonal foliage indicators.
† Estimated based on range of acquisition dates provided in metadata or inferred from seasonal foliage indicators.
§ Error calculated by ArcGIS while georeferencing each image to the 2016 base image.

## Sheet: Table S2
Table DR2. X POSITIONS OF MOBILE GROUND CONTROL POINTS*
Image Date (decimal year)†	1	2	3	4	5	6	7	8	9	10	11	12	13	14	15	16	17	18	19	20	21	22	23	24	25	26	27	28	29	30	31	32	33	34	35	36	37	38	39	40	41	42	43	44	45	46	47	48	49
1937.5	610525	610463	610566	610531	610503	610475	610497	610435	610603	610603	610645	610492	610402	610321	610352	610398	610528	610515	610659	610634	610649	NaN	610642	610754	NaN	610350	610362	NaN	NaN	NaN	NaN	NaN	NaN	NaN	610365	610417	610371	610306	610319	610359	610312	610301	610270	610339	610282	NaN	NaN	NaN	NaN
1948.5	610516	610456	610560	610526	610496	610465	610478	610417	610607	610594	610646	610494	610398	610319	610350	610398	610529	610510	610661	610636	610651	610603	610647	610757	NaN	610339	610352	NaN	NaN	NaN	NaN	NaN	NaN	NaN	610357	610396	610354	610302	610313	610353	610306	610295	610265	610335	610278	NaN	NaN	NaN	NaN
1960.5	610495	610449	610552	610520	610484	610454	610463	610390	610606	610584	610646	610503	610400	610319	610350	610399	610529	610511	610658	610633	610651	610603	610647	610757	NaN	610302	610310	610354	610359	610335	610342	610358	610359	610356	610321	610367	610330	610301	610314	610352	610308	610296	610265	610335	610277	610352	NaN	NaN	NaN
1968.5	610491	610446	610552	610518	610480	610453	610461	610388	610607	610585	610649	610501	610400	610319	610351	610398	610528	610508	610657	610634	610650	610603	610645	610759	NaN	610306	610314	610348	610354	610329	610339	610355	610358	610355	610318	610365	610332	610304	610315	610358	610313	610301	610265	610334	610276	610353	NaN	NaN	NaN
1971.5	610489	610445	610551	610518	610483	610454	610460	610383	610608	610580	610648	610504	610400	610319	610350	610397	610530	610511	610662	610634	610649	NaN	610646	610755	NaN	610308	610315	610342	610349	610325	610335	610352	610357	610355	610315	610357	610329	610303	610318	610357	NaN	610302	610263	610331	NaN	NaN	NaN	NaN	NaN
1987.5	610476	610426	610543	610514	610472	610449	610448	610365	610607	610576	610653	610513	610402	610321	610351	610399	610529	610504	610658	610632	610651	610603	610648	610762	610497	610327	610343	610315	610315	610294	610293	610324	610326	610315	NaN	NaN	NaN	610302	NaN	610355	NaN	NaN	610266	610332	610275	610354	610349	610352	610354
1993.44	610474	610424	610545	610516	610473	610449	610445	610363	610607	610570	610641	610514	610398	610318	610350	610398	610528	610509	610655	610631	610649	610604	610646	610746	610502	610320	NaN	610315	610315	610295	610300	610328	610330	610319	NaN	NaN	NaN	610302	NaN	NaN	NaN	NaN	610258	610329	610274	610351	610356	610358	610361
1998.5	610472	610419	610541	610514	610470	610447	610448	610360	610605	610571	610646	610512	610398	610319	610350	610397	610527	610504	610655	610631	610649	610604	610646	610758	610497	610330	NaN	610314	610314	610296	610295	610318	610323	610311	NaN	NaN	NaN	610304	NaN	NaN	NaN	NaN	610265	610330	NaN	610356	610349	610353	610357
2002.37	610473	610421	610545	610517	610470	610448	610445	610362	610608	610572	610642	610513	610397	610317	610347	610397	610530	610509	610659	610634	610653	610605	610648	610755	610503	610318	NaN	610311	610311	610293	610299	610323	610325	NaN	NaN	NaN	NaN	NaN	NaN	NaN	NaN	NaN	610260	610328	NaN	610354	NaN	NaN	NaN
2003.45	610478	610424	610548	610522	610475	610453	610451	610364	610609	610572	610643	610516	610399	610319	610349	610398	610529	610511	610659	610636	610653	610606	610648	610756	610506	610319	NaN	610316	610316	610298	610301	610325	610327	610318	NaN	NaN	NaN	610308	NaN	NaN	NaN	NaN	610264	610332	NaN	610356	610354	610359	610363
2004.51	610477	610423	610545	610521	610476	610452	610449	610366	610609	610573	610647	610517	610399	610318	610349	610397	610532	610512	610663	610634	610648	NaN	610649	NaN	610507	610320	NaN	610316	610319	610299	610306	610327	610329	610318	NaN	NaN	NaN	NaN	NaN	NaN	NaN	NaN	NaN	NaN	NaN	NaN	610356	610361	610365
2005.45	610473	610420	610544	610515	610469	610446	610447	610360	610608	610572	610652	610515	610400	610320	610350	610399	610529	610504	610657	610632	610649	610604	610649	610759	610500	610325	NaN	610314	610313	610296	610297	610318	610321	610310	NaN	NaN	NaN	610304	NaN	NaN	NaN	NaN	610263	610330	NaN	610354	610351	610355	610359
2006.46	610469	610415	610543	610516	610469	610447	610440	610354	610608	610564	610639	610515	610398	610316	610349	610398	610527	610506	610655	610631	610648	610603	610645	610747	610504	610312	NaN	610303	610306	610288	610295	610316	610317	610306	NaN	NaN	NaN	610300	NaN	NaN	NaN	NaN	610258	610327	NaN	610353	610350	610355	610360
2009.38	610471	610417	610542	610516	610470	610447	610444	610358	610607	610570	610645	610515	610399	610318	610350	610397	610526	610506	610657	610630	610649	610604	610648	610755	610500	610320	NaN	610310	610310	610293	610294	610316	610318	610307	NaN	NaN	NaN	610303	NaN	NaN	NaN	NaN	610264	610331	NaN	610357	610349	610354	610359
2010.41	610471	610417	610543	610516	610469	610447	610443	NaN	610607	610569	610646	610515	610400	610319	610351	610397	610527	610506	610656	610630	610649	610604	610647	610756	610501	610322	NaN	610313	610312	610295	610296	610317	610318	610308	NaN	NaN	NaN	610304	NaN	NaN	NaN	NaN	610263	610332	NaN	610356	610351	610357	610361
2011.34	610471	610416	610542	610515	610468	610447	610443	NaN	610607	610570	610647	610515	610400	610318	610350	610398	610526	610507	610658	610630	610649	610604	610647	610756	610500	610322	NaN	610311	610312	610294	610295	610315	610316	610307	NaN	NaN	NaN	610304	NaN	NaN	NaN	NaN	610264	610331	NaN	610357	610350	610354	610359
2012.38	610472	610417	610542	610516	610468	610447	610443	NaN	610608	610571	610646	610516	610400	610319	610350	610398	610526	610506	610658	610631	610650	610605	610648	610755	610501	610321	NaN	610311	610312	610294	610296	610316	610317	610307	NaN	NaN	NaN	610305	NaN	NaN	NaN	NaN	610262	610331	NaN	610354	610349	610355	610360
2013.42	610472	610417	610542	610515	610469	610447	610443	NaN	610608	610571	610645	610515	610399	610319	610350	610399	610526	610508	610658	610631	610650	610605	610646	610755	610500	610321	NaN	610310	610312	610293	610295	610316	610317	610307	NaN	NaN	NaN	610304	NaN	NaN	NaN	NaN	610263	610331	NaN	610355	610349	610355	610360
2014.75	610472	610418	610542	610516	610469	610446	610444	NaN	610609	610572	610646	610516	610400	610320	610350	610398	610527	610507	610658	610630	610649	610605	610647	610756	610500	610321	NaN	610309	610310	610292	610294	610315	610316	610306	NaN	NaN	NaN	610303	NaN	NaN	NaN	NaN	610263	610332	NaN	610354	610349	610354	610360
2015.83	610470	610416	610543	610515	610470	610447	610443	NaN	610607	610571	610646	610516	610400	610319	610350	610397	610526	610507	610657	610630	610649	610604	610647	610755	610501	610322	NaN	610312	610312	610294	610296	610317	610318	610308	NaN	NaN	NaN	610303	NaN	NaN	NaN	NaN	610262	610332	NaN	610356	610351	610355	610361
2016.74	610470	610416	610542	610515	610470	610447	610442	NaN	610607	610569	610645	610516	610399	610319	610349	610397	610526	610507	610656	610631	610649	610602	610647	610755	610500	610321	NaN	610310	610311	610293	610295	610316	610316	610306	NaN	NaN	NaN	610303	NaN	NaN	NaN	NaN	610263	610332	NaN	610356	610349	610353	610360
2017.53	610470	610416	610544	610517	610471	610447	610441	NaN	NaN	610568	NaN	610517	NaN	NaN	610351	NaN	NaN	610508	610657	610630	610649	NaN	NaN	610752	610503	610323	NaN	NaN	NaN	NaN	NaN	610317	610317	NaN	NaN	NaN	NaN	610305	NaN	NaN	NaN	NaN	610263	610336	NaN	610359	NaN	610356	610362
* Projected Coordinate System: NAD 83 UTM Zone 10N, units in meters
† Year for each image was given, but date was occasionally inferred from a range of listed acquisition dates or inferred from seasonal foliage indicators.
[truncated: 7 more columns]

## Sheet: Table S3
Table DR3. Y POSITIONS OF MOBILE GROUND CONTROL POINTS*
Image Date (decimal year)†	1	2	3	4	5	6	7	8	9	10	11	12	13	14	15	16	17	18	19	20	21	22	23	24	25	26	27	28	29	30	31	32	33	34	35	36	37	38	39	40	41	42	43	44	45	46	47	48	49
1937.5	4.14681e+06	4.14686e+06	4.14693e+06	4.14691e+06	4.14687e+06	4.14689e+06	4.14677e+06	4.14666e+06	4.14718e+06	4.14698e+06	4.14735e+06	4.14715e+06	4.1472e+06	4.14706e+06	4.147e+06	4.14705e+06	4.14709e+06	4.14705e+06	4.14709e+06	4.14702e+06	4.14695e+06	NaN	4.14728e+06	4.14719e+06	NaN	4.14653e+06	4.14649e+06	NaN	NaN	NaN	NaN	NaN	NaN	NaN	4.14663e+06	4.14658e+06	4.14656e+06	4.1461e+06	4.14613e+06	4.14618e+06	4.14626e+06	4.14619e+06	4.14605e+06	4.14578e+06	4.14595e+06	NaN	NaN	NaN	NaN
1948.5	4.1468e+06	4.14685e+06	4.14692e+06	4.1469e+06	4.14686e+06	4.14687e+06	4.14675e+06	4.14662e+06	4.14719e+06	4.14697e+06	4.14735e+06	4.14716e+06	4.1472e+06	4.14706e+06	4.14699e+06	4.14705e+06	4.14709e+06	4.14704e+06	4.1471e+06	4.14703e+06	4.14695e+06	4.14685e+06	4.14729e+06	4.14719e+06	NaN	4.14648e+06	4.14645e+06	NaN	NaN	NaN	NaN	NaN	NaN	NaN	4.14658e+06	4.14654e+06	4.14652e+06	4.1461e+06	4.14613e+06	4.14618e+06	4.14627e+06	4.14619e+06	4.14605e+06	4.14578e+06	4.14595e+06	NaN	NaN	NaN	NaN
1960.5	4.14677e+06	4.14681e+06	4.1469e+06	4.14688e+06	4.14682e+06	4.14685e+06	4.14671e+06	4.14655e+06	4.14719e+06	4.14695e+06	4.14735e+06	4.14715e+06	4.1472e+06	4.14706e+06	4.14699e+06	4.14705e+06	4.14708e+06	4.14702e+06	4.1471e+06	4.14703e+06	4.14695e+06	4.14685e+06	4.14729e+06	4.14719e+06	NaN	4.14639e+06	4.14636e+06	4.14656e+06	4.14658e+06	4.14656e+06	4.14659e+06	4.14666e+06	4.14664e+06	4.14662e+06	4.14647e+06	4.14644e+06	4.14641e+06	4.1461e+06	4.14613e+06	4.14618e+06	4.14626e+06	4.14619e+06	4.14605e+06	4.14578e+06	4.14595e+06	4.14582e+06	NaN	NaN	NaN
1968.5	4.14677e+06	4.1468e+06	4.1469e+06	4.14687e+06	4.14681e+06	4.14684e+06	4.1467e+06	4.14654e+06	4.14719e+06	4.14695e+06	4.14736e+06	4.14715e+06	4.1472e+06	4.14706e+06	4.14699e+06	4.14705e+06	4.14708e+06	4.14701e+06	4.1471e+06	4.14703e+06	4.14695e+06	4.14685e+06	4.14729e+06	4.1472e+06	NaN	4.14638e+06	4.14635e+06	4.14654e+06	4.14656e+06	4.14654e+06	4.14658e+06	4.14664e+06	4.14663e+06	4.14661e+06	4.14646e+06	4.14643e+06	4.1464e+06	4.1461e+06	4.14613e+06	4.14618e+06	4.14626e+06	4.14619e+06	4.14605e+06	4.14578e+06	4.14595e+06	4.14582e+06	NaN	NaN	NaN
1971.5	4.14677e+06	4.1468e+06	4.1469e+06	4.14687e+06	4.14681e+06	4.14684e+06	4.1467e+06	4.14653e+06	4.14719e+06	4.14695e+06	4.14735e+06	4.14715e+06	4.1472e+06	4.14706e+06	4.14699e+06	4.14705e+06	4.14708e+06	4.14701e+06	4.1471e+06	4.14703e+06	4.14695e+06	NaN	4.14729e+06	4.14719e+06	NaN	4.14638e+06	4.14634e+06	4.14653e+06	4.14655e+06	4.14654e+06	4.14656e+06	4.14663e+06	4.14662e+06	4.1466e+06	4.14645e+06	4.14642e+06	4.1464e+06	4.1461e+06	4.14613e+06	4.14618e+06	NaN	4.14619e+06	4.14605e+06	4.14578e+06	NaN	NaN	NaN	NaN	NaN
1987.5	4.14675e+06	4.14677e+06	4.14689e+06	4.14686e+06	4.14679e+06	4.14681e+06	4.14667e+06	4.14646e+06	4.14719e+06	4.14694e+06	4.14735e+06	4.14714e+06	4.1472e+06	4.14706e+06	4.14699e+06	4.14705e+06	4.14706e+06	4.147e+06	4.1471e+06	4.14702e+06	4.14695e+06	4.14685e+06	4.14729e+06	4.14719e+06	4.14734e+06	4.14629e+06	4.14625e+06	4.14644e+06	4.14646e+06	4.14645e+06	4.14648e+06	4.14654e+06	4.14653e+06	4.1465e+06	NaN	NaN	NaN	4.1461e+06	NaN	4.14618e+06	NaN	NaN	4.14605e+06	4.14577e+06	4.14595e+06	4.14581e+06	4.14658e+06	4.14661e+06	4.14663e+06
1993.44	4.14675e+06	4.14677e+06	4.14689e+06	4.14685e+06	4.14679e+06	4.14681e+06	4.14667e+06	4.14646e+06	4.14719e+06	4.14694e+06	4.14735e+06	4.14714e+06	4.1472e+06	4.14706e+06	4.14699e+06	4.14705e+06	4.14706e+06	4.147e+06	4.1471e+06	4.14702e+06	4.14695e+06	4.14685e+06	4.14729e+06	4.14719e+06	4.14734e+06	4.14628e+06	4.14624e+06	4.14644e+06	4.14645e+06	4.14645e+06	4.14648e+06	4.14654e+06	4.14653e+06	4.1465e+06	NaN	NaN	NaN	4.1461e+06	NaN	NaN	NaN	NaN	4.14605e+06	4.14577e+06	4.14595e+06	4.14581e+06	4.14658e+06	4.1466e+06	4.14662e+06
1998.5	4.14675e+06	4.14676e+06	4.14688e+06	4.14685e+06	4.14679e+06	4.14681e+06	4.14666e+06	4.14645e+06	4.14719e+06	4.14694e+06	4.14735e+06	4.14713e+06	4.1472e+06	4.14706e+06	4.14699e+06	4.14705e+06	4.14706e+06	4.14699e+06	4.1471e+06	4.14702e+06	4.14695e+06	4.14685e+06	4.14729e+06	4.1472e+06	4.14733e+06	4.14627e+06	NaN	4.14643e+06	4.14644e+06	4.14644e+06	4.14646e+06	4.14652e+06	4.14651e+06	4.14649e+06	NaN	NaN	NaN	4.1461e+06	NaN	NaN	NaN	NaN	4.14606e+06	4.14575e+06	NaN	4.14579e+06	4.14656e+06	4.14659e+06	4.14661e+06
2002.37	4.14675e+06	4.14676e+06	4.14688e+06	4.14685e+06	4.14679e+06	4.14681e+06	4.14666e+06	4.14645e+06	4.14719e+06	4.14694e+06	4.14735e+06	4.14714e+06	4.1472e+06	4.14706e+06	4.14699e+06	4.14705e+06	4.14706e+06	4.14699e+06	4.1471e+06	4.14702e+06	4.14695e+06	4.14685e+06	4.14729e+06	4.14719e+06	4.14734e+06	4.14627e+06	NaN	4.14644e+06	4.14644e+06	4.14644e+06	4.14647e+06	4.14652e+06	4.14651e+06	NaN	NaN	NaN	NaN	NaN	NaN	NaN	NaN	NaN	4.14606e+06	4.14575e+06	NaN	4.14579e+06	NaN	NaN	NaN
2003.45	4.14674e+06	4.14676e+06	4.14689e+06	4.14685e+06	4.14679e+06	4.14681e+06	4.14666e+06	4.14645e+06	4.14719e+06	4.14694e+06	4.14735e+06	4.14714e+06	4.1472e+06	4.14706e+06	4.14699e+06	4.14705e+06	4.14706e+06	4.14699e+06	4.1471e+06	4.14703e+06	4.14695e+06	4.14685e+06	4.14729e+06	4.14719e+06	4.14734e+06	4.14627e+06	NaN	4.14643e+06	4.14644e+06	4.14644e+06	4.14647e+06	4.14652e+06	4.14651e+06	4.14649e+06	NaN	NaN	NaN	4.1461e+06	NaN	NaN	NaN	NaN	4.14606e+06	4.14574e+06	NaN	4.14578e+06	4.14657e+06	4.14659e+06	4.14661e+06
2004.51	4.14675e+06	4.14676e+06	4.14688e+06	4.14685e+06	4.14679e+06	4.14681e+06	4.14666e+06	4.14645e+06	4.14719e+06	4.14694e+06	4.14735e+06	4.14714e+06	4.1472e+06	4.14706e+06	4.14699e+06	4.14705e+06	4.14706e+06	4.14699e+06	4.1471e+06	4.14702e+06	4.14695e+06	NaN	4.14729e+06	NaN	4.14734e+06	4.14627e+06	NaN	4.14643e+06	4.14645e+06	4.14644e+06	4.14647e+06	4.14652e+06	4.14651e+06	4.14649e+06	NaN	NaN	NaN	NaN	NaN	NaN	NaN	NaN	NaN	NaN	NaN	NaN	4.14657e+06	4.14659e+06	4.14662e+06
2005.45	4.14674e+06	4.14676e+06	4.14688e+06	4.14685e+06	4.14679e+06	4.14681e+06	4.14666e+06	4.14645e+06	4.14719e+06	4.14694e+06	4.14735e+06	4.14713e+06	4.1472e+06	4.14706e+06	4.14699e+06	4.14705e+06	4.14706e+06	4.14699e+06	4.1471e+06	4.14702e+06	4.14695e+06	4.14685e+06	4.14729e+06	4.14719e+06	4.14733e+06	4.14626e+06	NaN	4.14643e+06	4.14644e+06	4.14644e+06	4.14646e+06	4.14651e+06	4.14651e+06	4.14648e+06	NaN	NaN	NaN	4.1461e+06	NaN	NaN	NaN	NaN	4.14605e+06	4.14574e+06	NaN	4.14578e+06	4.14656e+06	4.14659e+06	4.14661e+06
2006.46	4.14674e+06	4.14676e+06	4.14688e+06	4.14685e+06	4.14679e+06	4.14681e+06	4.14666e+06	4.14644e+06	4.14719e+06	4.14694e+06	4.14735e+06	4.14714e+06	4.1472e+06	4.14706e+06	4.14699e+06	4.14705e+06	4.14706e+06	4.14699e+06	4.14709e+06	4.14702e+06	4.14695e+06	4.14684e+06	4.14729e+06	4.14719e+06	4.14733e+06	4.14625e+06	NaN	4.14642e+06	4.14643e+06	4.14643e+06	4.14646e+06	4.14651e+06	4.1465e+06	4.14648e+06	NaN	NaN	NaN	4.1461e+06	NaN	NaN	NaN	NaN	4.14605e+06	4.14574e+06	NaN	4.14578e+06	4.14656e+06	4.14658e+06	4.14661e+06
2009.38	4.14674e+06	4.14676e+06	4.14688e+06	4.14685e+06	4.14678e+06	4.14681e+06	4.14666e+06	4.14644e+06	4.14719e+06	4.14694e+06	4.14735e+06	4.14713e+06	4.1472e+06	4.14706e+06	4.14699e+06	4.14705e+06	4.14706e+06	4.14699e+06	4.1471e+06	4.14702e+06	4.14695e+06	4.14685e+06	4.14729e+06	4.14719e+06	4.14733e+06	4.14625e+06	NaN	4.14642e+06	4.14643e+06	4.14643e+06	4.14646e+06	4.14651e+06	4.1465e+06	4.14648e+06	NaN	NaN	NaN	4.1461e+06	NaN	NaN	NaN	NaN	4.14605e+06	4.14574e+06	NaN	4.14578e+06	4.14656e+06	4.14658e+06	4.1466e+06
2010.41	4.14674e+06	4.14676e+06	4.14688e+06	4.14685e+06	4.14678e+06	4.14681e+06	4.14666e+06	NaN	4.14719e+06	4.14694e+06	4.14735e+06	4.14713e+06	4.1472e+06	4.14706e+06	4.14699e+06	4.14705e+06	4.14706e+06	4.14699e+06	4.1471e+06	4.14702e+06	4.14695e+06	4.14685e+06	4.14729e+06	4.14719e+06	4.14733e+06	4.14625e+06	NaN	4.14642e+06	4.14643e+06	4.14643e+06	4.14646e+06	4.14651e+06	4.1465e+06	4.14648e+06	NaN	NaN	NaN	4.1461e+06	NaN	NaN	NaN	NaN	4.14605e+06	4.14574e+06	NaN	4.14578e+06	4.14656e+06	4.14658e+06	4.1466e+06
2011.34	4.14674e+06	4.14676e+06	4.14688e+06	4.14685e+06	4.14679e+06	4.14681e+06	4.14666e+06	NaN	4.14719e+06	4.14694e+06	4.14735e+06	4.14713e+06	4.1472e+06	4.14706e+06	4.14699e+06	4.14705e+06	4.14706e+06	4.14699e+06	4.1471e+06	4.14702e+06	4.14695e+06	4.14685e+06	4.14729e+06	4.14719e+06	4.14733e+06	4.14625e+06	NaN	4.14642e+06	4.14643e+06	4.14643e+06	4.14646e+06	4.14651e+06	4.1465e+06	4.14648e+06	NaN	NaN	NaN	4.1461e+06	NaN	NaN	NaN	NaN	4.14605e+06	4.14574e+06	NaN	4.14578e+06	4.14656e+06	4.14658e+06	4.1466e+06
2012.38	4.14674e+06	4.14676e+06	4.14688e+06	4.14685e+06	4.14678e+06	4.14681e+06	4.14666e+06	NaN	4.14719e+06	4.14694e+06	4.14735e+06	4.14713e+06	4.1472e+06	4.14706e+06	4.14699e+06	4.14705e+06	4.14706e+06	4.14699e+06	4.1471e+06	4.14702e+06	4.14695e+06	4.14685e+06	4.14729e+06	4.14719e+06	4.14733e+06	4.14625e+06	NaN	4.14642e+06	4.14643e+06	4.14643e+06	4.14646e+06	4.14651e+06	4.1465e+06	4.14648e+06	NaN	NaN	NaN	4.1461e+06	NaN	NaN	NaN	NaN	4.14605e+06	4.14574e+06	NaN	4.14578e+06	4.14656e+06	4.14658e+06	4.1466e+06
2013.42	4.14674e+06	4.14675e+06	4.14688e+06	4.14685e+06	4.14679e+06	4.14681e+06	4.14666e+06	NaN	4.14719e+06	4.14694e+06	4.14735e+06	4.14713e+06	4.1472e+06	4.14706e+06	4.14699e+06	4.14705e+06	4.14706e+06	4.14699e+06	4.1471e+06	4.14702e+06	4.14695e+06	4.14685e+06	4.14729e+06	4.14719e+06	4.14733e+06	4.14625e+06	NaN	4.14642e+06	4.14643e+06	4.14643e+06	4.14646e+06	4.14651e+06	4.1465e+06	4.14648e+06	NaN	NaN	NaN	4.1461e+06	NaN	NaN	NaN	NaN	4.14605e+06	4.14574e+06	NaN	4.14578e+06	4.14656e+06	4.14658e+06	4.1466e+06
2014.75	4.14674e+06	4.14675e+06	4.14688e+06	4.14685e+06	4.14678e+06	4.14681e+06	4.14666e+06	NaN	4.14719e+06	4.14694e+06	4.14735e+06	4.14713e+06	4.1472e+06	4.14706e+06	4.14699e+06	4.14705e+06	4.14706e+06	4.14699e+06	4.1471e+06	4.14702e+06	4.14695e+06	4.14685e+06	4.14729e+06	4.14719e+06	4.14733e+06	4.14625e+06	NaN	4.14642e+06	4.14643e+06	4.14643e+06	4.14646e+06	4.14651e+06	4.1465e+06	4.14648e+06	NaN	NaN	NaN	4.1461e+06	NaN	NaN	NaN	NaN	4.14606e+06	4.14574e+06	NaN	4.14578e+06	4.14656e+06	4.14658e+06	4.1466e+06
2015.83	4.14674e+06	4.14676e+06	4.14688e+06	4.14685e+06	4.14678e+06	4.14681e+06	4.14666e+06	NaN	4.14719e+06	4.14694e+06	4.14735e+06	4.14713e+06	4.1472e+06	4.14706e+06	4.14699e+06	4.14705e+06	4.14706e+06	4.14699e+06	4.14709e+06	4.14702e+06	4.14695e+06	4.14685e+06	4.14729e+06	4.14719e+06	4.14734e+06	4.14625e+06	NaN	4.14642e+06	4.14643e+06	4.14643e+06	4.14646e+06	4.14651e+06	4.1465e+06	4.14648e+06	NaN	NaN	NaN	4.1461e+06	NaN	NaN	NaN	NaN	4.14605e+06	4.14574e+06	NaN	4.14578e+06	4.14656e+06	4.14658e+06	4.1466e+06
2016.74	4.14674e+06	4.14675e+06	4.14688e+06	4.14685e+06	4.14678e+06	4.14681e+06	4.14666e+06	NaN	4.14719e+06	4.14694e+06	4.14735e+06	4.14713e+06	4.1472e+06	4.14706e+06	4.14699e+06	4.14705e+06	4.14706e+06	4.14699e+06	4.14709e+06	4.14702e+06	4.14695e+06	4.14685e+06	4.14729e+06	4.14719e+06	4.14733e+06	4.14625e+06	NaN	4.14642e+06	4.14643e+06	4.14643e+06	4.14646e+06	4.14651e+06	4.1465e+06	4.14648e+06	NaN	NaN	NaN	4.1461e+06	NaN	NaN	NaN	NaN	4.14606e+06	4.14574e+06	NaN	4.14578e+06	4.14656e+06	4.14658e+06	4.1466e+06
2017.53	4.14674e+06	4.14675e+06	4.14688e+06	4.14685e+06	4.14678e+06	4.1468e+06	4.14666e+06	NaN	NaN	4.14694e+06	NaN	4.14713e+06	NaN	NaN	4.14699e+06	NaN	NaN	4.14699e+06	4.1471e+06	4.14702e+06	4.14695e+06	NaN	NaN	4.14719e+06	4.14733e+06	4.14625e+06	NaN	NaN	NaN	NaN	NaN	4.1465e+06	4.1465e+06	NaN	NaN	NaN	NaN	4.1461e+06	NaN	NaN	NaN	NaN	4.14605e+06	4.14574e+06	NaN	4.14577e+06	NaN	4.14658e+06	4.1466e+06
* Projected Coordinate System: NAD 83 UTM Zone 10N, units in meters
† Year for each image was given, but date was occasionally inferred from a range of listed acquisition dates or inferred from seasonal foliage indicators.
[truncated: 7 more columns]

## Sheet: Table S4
TABLE DR4. DECADAL VELOCITY
Interval Number	Interval Start (decimal year)	Interval End (decimal year)	Interval Midpoint (decimal year)	Interval Average Velocity (m/a)					Standard Errors on Interval Average Velocity (m/a)
				Source Zone	Upper Transport Zone	Lower Transport Zone	Transition Zone	Extensional Zone (Toe)	Source Zone	Upper Transport Zone	Lower Transport Zone	Transition Zone	Extensional Zone (Toe)
1	1937.5	1948.5	1943	-0.313159	0.989109	3.82271	-0.2161	0.511528	0.14017	0.194774	0.185026	0.0476677	0.114595
2	1948.5	1960.5	1954.5	0.122916	2.17274	8.05162	0.166442	-0.360667	0.0629993	0.26745	0.428194	0.0758479	0.0281402
3	1960.5	1971.5	1966	-0.144682	0.491735	2.0107	0.00181618	0.34554	0.0620483	0.0782585	0.182402	0.0927051	0.0901286
4	1971.5	1987.5	1979.5	0.157794	1.23685	5.43557	0.0253727	0.285507	0.0470194	0.130207	0.154351	0.0808138	0.0805053
5	1987.5	1998.5	1993	-0.00647864	0.369164	1.3943	-0.219143	2.53573	0.072886	0.0616438	0.114411	0.234479	0.137043
6	1998.5	2009.38	2003.94	0.0294005	0.277254	0.925348	0.0464444	0.728117	0.0593033	0.0686103	0.0825953	0.138126	0.0819085
7	2009.38	2017.53	2013.45	0.0275106	0.149731	0.286716	0.00489632	0.477555	0.0509009	0.0295157	0.0234953	0.0897258	0.101792
